# Supplementary material for: Multi-shape memory effect of polyimides with extremely high strain
Source: Royal Society of Chemistry journal article supplement (doi:10.1039/c7ra11399d), 2017-01-01
Supplement: c7ra11399d1.pdf [file c7ra11399d1.pdf]

## **Multi-shape Memory Effect of Polyimides with Extremely High Strain**

Jianan Yao,<sup>a</sup> Zhao Zhang,<sup>a</sup> Chunbo Wang,<sup>a</sup> Shengqi Ma,<sup>a</sup> Tianqi Li,<sup>b</sup> Xiaogang Zhao,<sup>a</sup> Daming Wang,<sup>a</sup> Hongwei Zhou,<sup>a</sup> and Chunhai Chen<sup>\*a</sup>

<sup>a</sup> National & Local Joint Engineering Laboratory for Synthesis Technology of High Performance Polymer, Key Laboratory of High Performance Plastics, Ministry of Education, College of Chemistry, Jilin University, Changchun, 130012, P. R. China

<sup>b</sup> State Key Laboratory of Supramolecular Structure and Materials, College of Chemistry, Jilin University, Changchun, 130012, P. R. China

\*Correspondence and requests for materials should be addressed to Chunhai Chen (email: cch@jlu.edu.cn).

### **Supporting information**

## Preparation of Crosslinked Polyimides

### 1. Materials

2,2'-Bis[4-(3-aminophenoxy)phenyl]hexafluoropropane (m-6FBAPP), 4,4'-(hexafluoroisopropylidene) (6FDA) were supplied by Changzhou Sunlight Pharmaceutical Co., Ltd. 1,1',1''-Tri(4-hydroxyphenyl)ethane, 1-fluoro-4-nitrobenzene, potassium carbonate ( $K_2CO_3$ ), 5% palladium on charcoal (Pd/C), and 80% hydrazine monohydrate were obtained from Acros and used as received. N,N-dimethylacetamide (DMAc) were purified by vacuum distillation over  $CaH_2$  and stored over 4 Å molecular sieves prior to use.

### 2. Preparation of 1,1',1''-tris[4-(aminophenoxy)phenyl]ethane (TAPE)

The TAPE was synthesized according the literature.<sup>1</sup> The route of triamine was shown in Scheme S1.

A 250 mL flask containing 1,1',1''-tri(4-hydroxyphenyl)ethane (5.00 g, 16.48 mmol), 1-fluoro-4-nitrobenzene (8.14 g, 57.69 mmol), 90 mL DMF, and potassium carbonate (7.97 g, 57.69 mmol) was fitted with a mechanical stirrer, condenser, nitrogen inlet and thermometer. The mixture was stirred at 75 °C for 6 h, then, the reaction mixture was cooled and poured into 500 ml of distilled water. The precipitated product was filtered off and washed with water until it was neutral. The crude product 1,1',1''-tris[4-(aminophenoxy)phenyl]ethane (TNPE) was recrystallized from DMF/water and then dried under vacuum at 80 °C for 10 h to yield 8.1 g (73%).

Under nitrogen protection, a mixture of 2 g (2.99 mmol) of TNPE, 0.15 g of Pd/C catalyst, and 30 mL of dioxane was placed into a 100 mL three-necked flask equipped with a dropping funnel, and reflux condenser. The mixture was stirred under reflux for 30 min, and then 10 mL of hydrazine hydrate was added dropwise over 2 h, followed by 6 h of reflux. The resulting mixture was filtered while hot to remove the catalyst and the filtrate was subsequently concentrated and poured into 500 mL of deionized water to produce a precipitate, which was washed with water. After recrystallization from dioxane/water, the product TAPE was dried under vacuum at 80 °C for 10 h to yield 1.4 g (81%).

TAPE Melting point: 223°C (DSC peak). <sup>1</sup>H NMR (DMSO, ppm): 6.96 (d, H<sub>b</sub>, 6H), 6.93 (d, H<sub>c</sub>, 6H), 6.76 (m, H<sub>e</sub>, 6H), 6.74 (m, H<sub>d</sub>, 6H), 4.97 (s, H<sub>a</sub>, 6H), 2.02 (m, H<sub>f</sub>, 6H); HRLC-MS (ESI): 579.6 (M+H)<sup>+</sup>, Calcd 580.5 for C<sub>38</sub>H<sub>33</sub>N<sub>3</sub>O<sub>3</sub>.

### 3. Preparation of polyimide films

The synthesis of PI-0.5 (m-6FBAPP/6FDA/0.5%mol TAPE) is used as an example to illustrate the general synthetic route as shown in Scheme S2. 1.7770 g 6FDA was added to a solution of 2.0427 g m-6FBAPP in 10 g DMAc with stirred under nitrogen. The reaction mixture stirred at room temperature for 24h to afford a viscous poly(amic acid) (PAA) solution. 0.0232 g TAPE as triamine crosslinker (equimolar with functional groups) and additional 5.4 g DMAc was added to the mixture with stirring for another 12h. The solid concentration of the reaction system was controlled at 20%wt. PI films were prepared by pouring the PAA onto the glass plates and then heated in air oven with a temperature procedure (50 °C/24h, 80 °C/24h) to remove the solvent. In addition, the materials were fully imidized at 100 °C/2h, 150 °C/2h, 200 °C/1h, 250 °C/1h, and 300 °C/1h under vacuum. The films were stripped from the plate by soaking into the distilled water they were cooled to room temperature, and the thickness is about 150 μm.

## Instruments and Measurements

1. Hydrogen nuclear magnetic resonance ( $^1\text{H}$  NMR) spectra were determined using a BRUKER-300 spectrometer (Massachusetts, USA) at 300 MHz DMSO- $d_6$ .
2. FTIR spectra were recorded using a FT-IR measurements were performed using a Bruker Vector 22 spectrometer (Massachusetts, USA) in the range of 400-4000  $\text{cm}^{-1}$ , with the samples in the form of thin films (PIs).
3. High resolution liquid chromatography-mass spectroscopy (HRLC-MS) data were obtained using an Agilent 1290-microTOF-QII (Bruker, Massachusetts, USA) high resolution mass spectrometer.
4. Gel content was measured by submerging the films in DMAc for 24h at room temperature.

$$\text{Gel Content (wt\%)} = \frac{\text{Undissolved PI}}{\text{Crosslinked PI}} \quad (1)$$

5. Thermo gravimetric analysis (TGA) was measured by a TA 2050 (Delaware, USA), with a heating rate of 10  $^{\circ}\text{C}/\text{min}$  under nitrogen.
6. Differential scanning calorimetric (DSC) analyses were performed using a TA instrument, DSC Q100 (Delaware, USA), at a scanning rate of 20  $^{\circ}\text{C}/\text{min}$  under a nitrogen flow of 50 mL/min.
7. Differential mechanical analysis (DMA) were performed using a TA instrument, DMA Q800 (Delaware, USA), at a scanning rate of 5  $^{\circ}\text{C}/\text{min}$  from 50 to 400  $^{\circ}\text{C}$ , an amplitude of 10  $\mu\text{m}$ , and a load frequency of 1 Hz in film tension geometry.  $T_g$  was regarded as the peak of  $\tan \delta$ .
8. Shape memory test:

The shape memory properties of polyimides were conducted on TA Instruments Q800. The samples were prepared in a rectangular mode (20mm $\times$ 5.0mm $\times$ 0.15mm). All the shape memory cycles were performed by tension clamps in controlled force mode. The detail test setup was listed below:

The polyimide films was first heated to  $T_d$  (deformation temperature) at 8  $^{\circ}\text{C}/\text{min}$ ; then the sample was stretched from  $\epsilon_{(N-1)}$  to a elongation at  $T_d$ , where N gives the number of the cycle. The sample was kept for 5min at  $\epsilon_{\text{load}(N)}$  and afterward cooled under load to 120  $^{\circ}\text{C}$  with a cooling rate of 8  $^{\circ}\text{C}/\text{min}$ . After unloading, the sample was in the temporary shape  $\epsilon_{(N)}$ . Then the recovery procedure was heating the sample back to  $T_d$  to get the  $\epsilon_{\text{re}(N)}$

Thermal-induced shape-memory behaviour of polyimides was evaluated by the shape fixity ( $R_f$ ) and the shape recovery ( $R_r$ ) based on the following equations:<sup>2</sup>

$$R_f = \frac{\epsilon_{(N)} - \epsilon_{(N-1)}}{\epsilon_{\text{load}(N)} - \epsilon_{(N-1)}} \times 100\% \quad (2)$$

$$R_r = \frac{\epsilon_{(N)} - \epsilon_{\text{re}(N-1)}}{\epsilon_{(N)} - \epsilon_{(N-1)}} \times 100\% \quad (3)$$

where  $\epsilon_{\text{load}}$  represents the maximum strain in the deformation procedure under load,  $\epsilon$  is the fixed strain after cooling and unloading the applied force,  $\epsilon_{\text{re}}$  is the corresponding strain after recovering, and N is the step number in one shape memory cycle.

9. Crosslink densities<sup>3-5</sup>

According to the Mooney-Rivlin equation

$$\sigma_N = (2C_1 + \frac{2C_2}{\lambda}) \cdot (\lambda - \frac{1}{\lambda^2}) \quad (4)$$

The samples of different crosslinker content were measured using a DMA Q800 in the mode of film tension. An increment force of 0.01N was applied for 20 min at a constant temperature of 220 °C to achieve a constant value of  $\lambda$  for the certain force. This procedure was repeated until the strain beyond the DMA detection limits. In addition, the Mooney-Rivlin equation was converted

to a linear relationship by the  $\frac{\sigma_N}{\lambda - \lambda^{-2}}$  and the  $\frac{1}{\lambda}$ . The coefficients  $2C_1$  and  $2C_2$  were obtained by linear fit, and the  $1.5 < \lambda < 2.5$ . The value of  $2C_2$ , which can be related to the number of the elastically effective trapped entanglements. The constant  $C_1$  is related to the shear modulus  $G$  in the following way

$$2C_1 = G = \frac{\rho_r RT}{M_c} \quad (5)$$

Where  $T$  is the absolute temperature,  $\rho_r$  is the polymer density, which was measured by pycnometer at 25 °C, and  $R$  is the gas constant (8.314 J·mol<sup>-1</sup>·K<sup>-1</sup>),  $M_c$  is the molecular weights of crosslinked polymers.  $M_n$  is the number-average of the molecular weight of the initial polymer.  $X_c$  is the crosslink densities of the polymers.

$$X_c = \frac{M_n}{M_c}$$

#### Figures and Tables

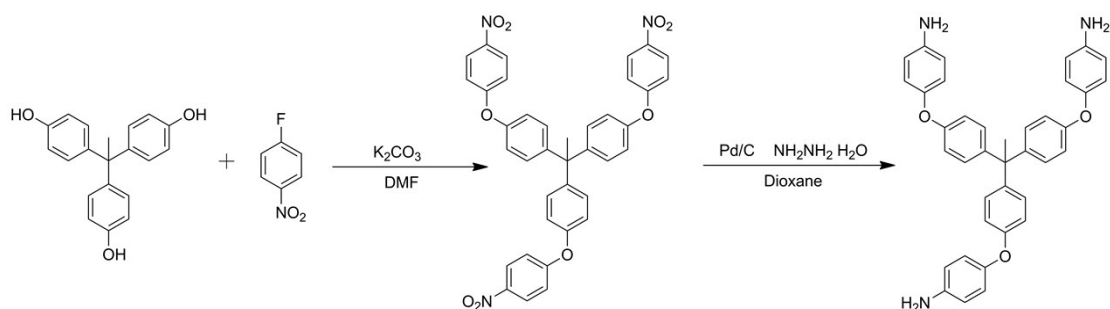

**Scheme S1.** Synthesis of triamine monomers

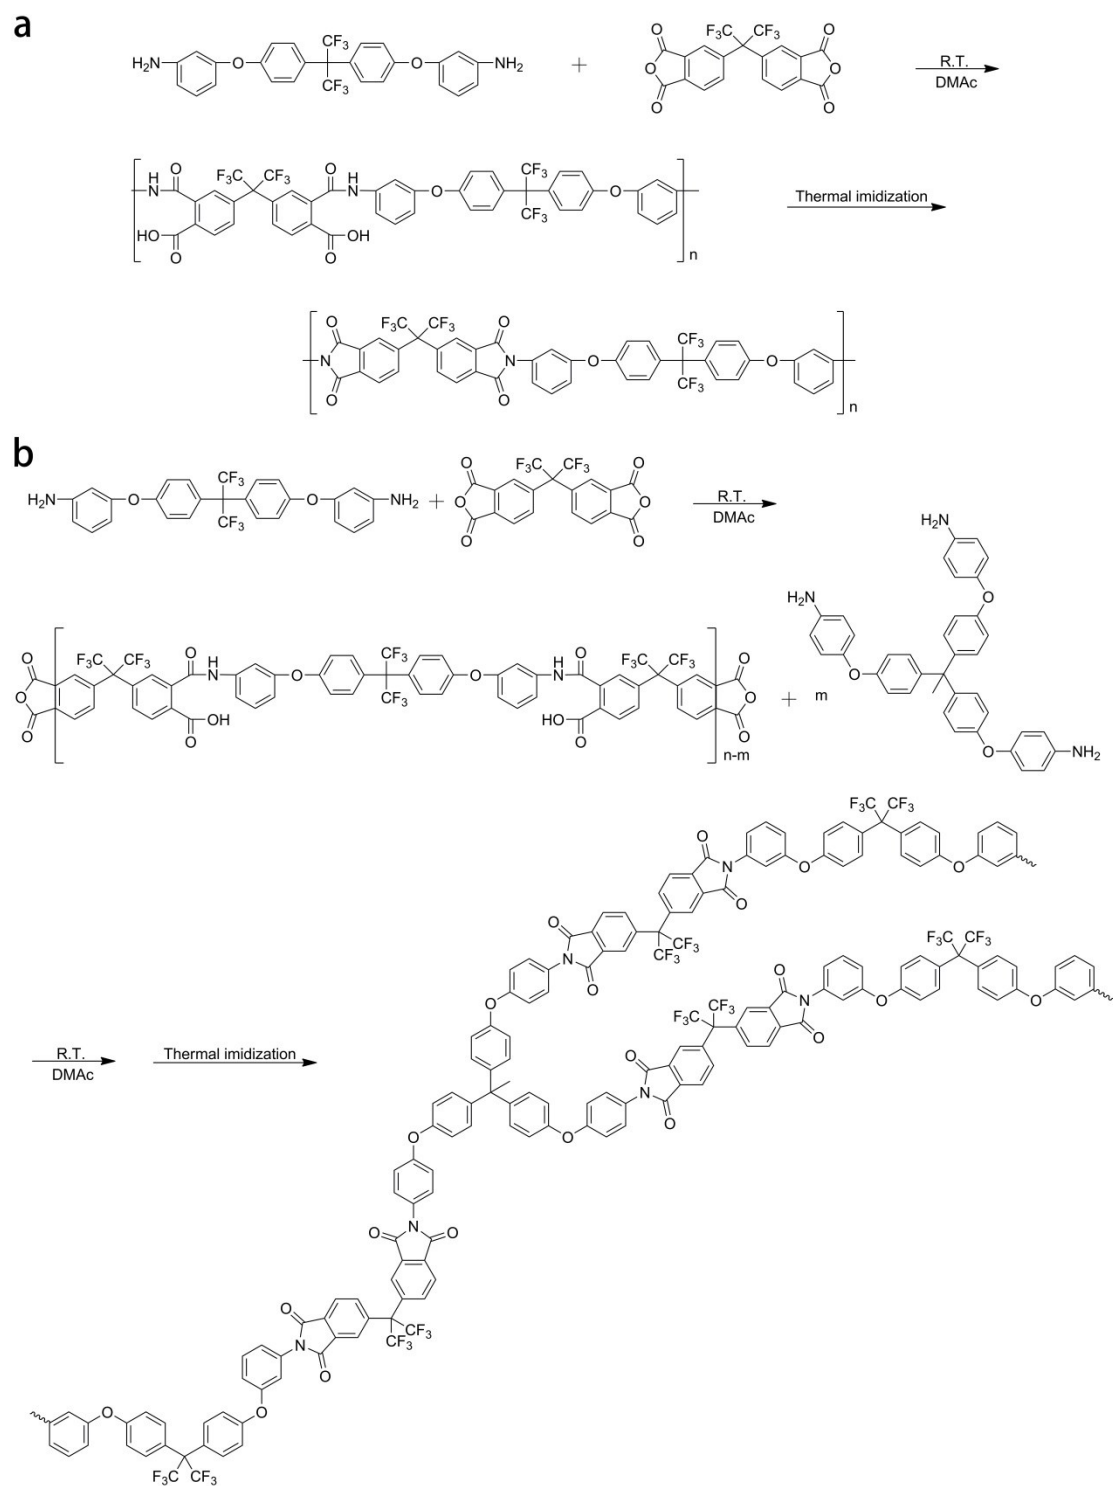

**Scheme S2. a) Synthesis route of PI-0. b) Synthesis route of crosslinked PI.**

**Table S1. Physical and thermal properties of the polyimides**

|        | Cross-linker<br>(mol%) | Gel Content<br>(wt%) | Crosslink density<br>(%) | T <sub>g</sub><br>(°C) | T <sub>5%</sub><br>(°C) <sup>a</sup> |
|--------|------------------------|----------------------|--------------------------|------------------------|--------------------------------------|
| PI-0   | 0                      | 0                    | -                        | 226                    | 529                                  |
| PI-0.5 | 0.5                    | 93.4                 | 0.24                     | 227                    | 528                                  |
| PI-1   | 1.0                    | 93.9                 | 0.25                     | 225                    | 526                                  |

|      |     |      |      |     |     |
|------|-----|------|------|-----|-----|
| PI-2 | 2.0 | 94.2 | 0.27 | 226 | 528 |
| PI-5 | 5.0 | 98.5 | 0.29 | 225 | 524 |

<sup>a</sup> 5% weight loss ( $T_{5\%}$ ) temperatures measured by TGA.

**Table S2.** Dual shape memory cycle for polyimides

|        | $\epsilon_{\max}(\%)$ | $R_f(\%)$ | $R_r(\%)$ |
|--------|-----------------------|-----------|-----------|
| PI-0   | 432                   | 99.6      | 64.5      |
| PI-0.5 | 460                   | 99.4      | 93.5      |
| PI-1   | 394                   | 99.7      | 97.2      |
| PI-2   | 111                   | 99.0      | 92.7      |
| PI-5   | 35                    | 97.6      | 95.5      |

**Table S3.** Measured SME parameters of the PI-0.5 and PI-5 for four cycles

|        | Cycle | $\epsilon_{\max}(\%)$ | $R_f(\%)$ | $R_r(\%)$ |
|--------|-------|-----------------------|-----------|-----------|
| PI-0.5 | 1st   | 69                    | 98.7      | 85.5      |
|        | 2nd   | 84                    | 98.7      | 87.0      |
|        | 3rd   | 95                    | 98.8      | 94.3      |
|        | 4th   | 105                   | 98.8      | 94.9      |
| PI-5   | 1st   | 61                    | 98.5      | 87.1      |
|        | 2nd   | 67                    | 98.4      | 94.7      |
|        | 3rd   | 70                    | 98.4      | 97.2      |
|        | 4th   | 72                    | 98.3      | 99.6      |

**Table S4.** The  $R_f$  and  $R_r$  data in a series of triple shape memory cycles for PI-0.5 with different second transition temperature

|                | $\epsilon_{(S0 \rightarrow S1)}$ | $\epsilon_{(S1 \rightarrow S2)}$ | $R_{f(S0 \rightarrow S1)}$ | $R_{f(S1 \rightarrow S2)}$ | $R_{r(S2, re \rightarrow S1, re)}$ | $R_{r(S1, re \rightarrow S0, re)}$ |
|----------------|----------------------------------|----------------------------------|----------------------------|----------------------------|------------------------------------|------------------------------------|
| 260 °C +220 °C | 116                              | 422                              | 70.1                       | 99.4                       | 91.5                               | 81.2                               |
| 260 °C +230 °C | 97                               | 398                              | 60.3                       | 99.5                       | 89.4                               | 71.5                               |
| 260 °C +240 °C | 91                               | 439                              | 43.2                       | 99.5                       | 90.7                               | 48.6                               |

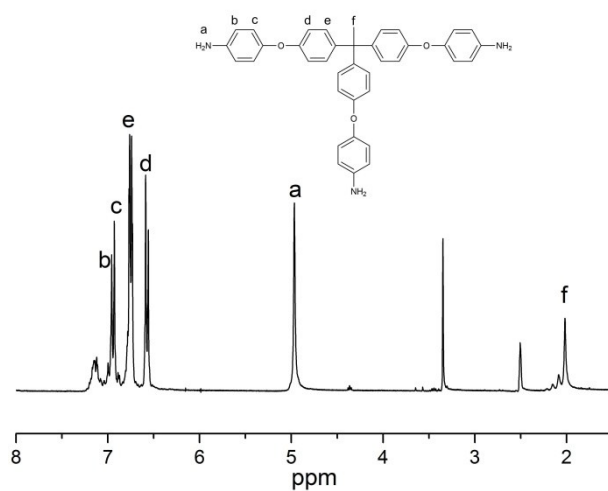

**Fig. S1**  $^1\text{H}$  NMR spectra of TAPE in DMSO.

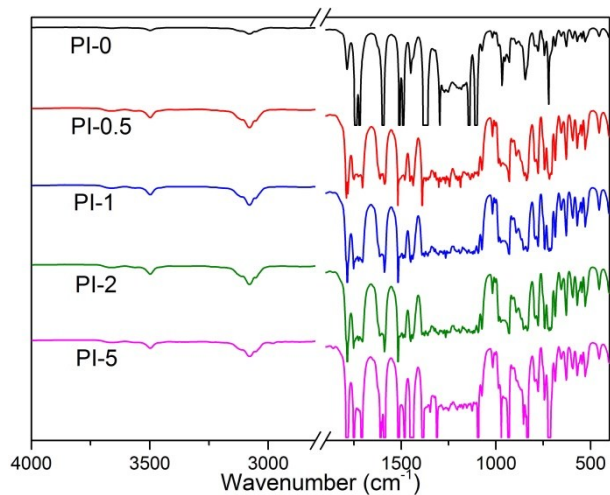

**Fig. S2** FT-IR spectra of polyimides. The absorptions of the imide ring appeared at  $1770\text{-}1785\text{ cm}^{-1}$  (asymmetrical C=O stretching),  $1720\text{-}1735\text{ cm}^{-1}$  (symmetrical C=O stretching), and  $1380\text{-}1400\text{ cm}^{-1}$  (C-N stretching).

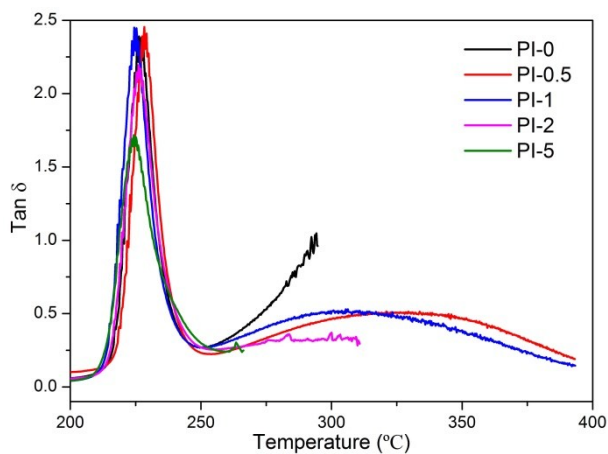

**Fig. S3**  $\text{Tan } \delta$  curves of polyimides.

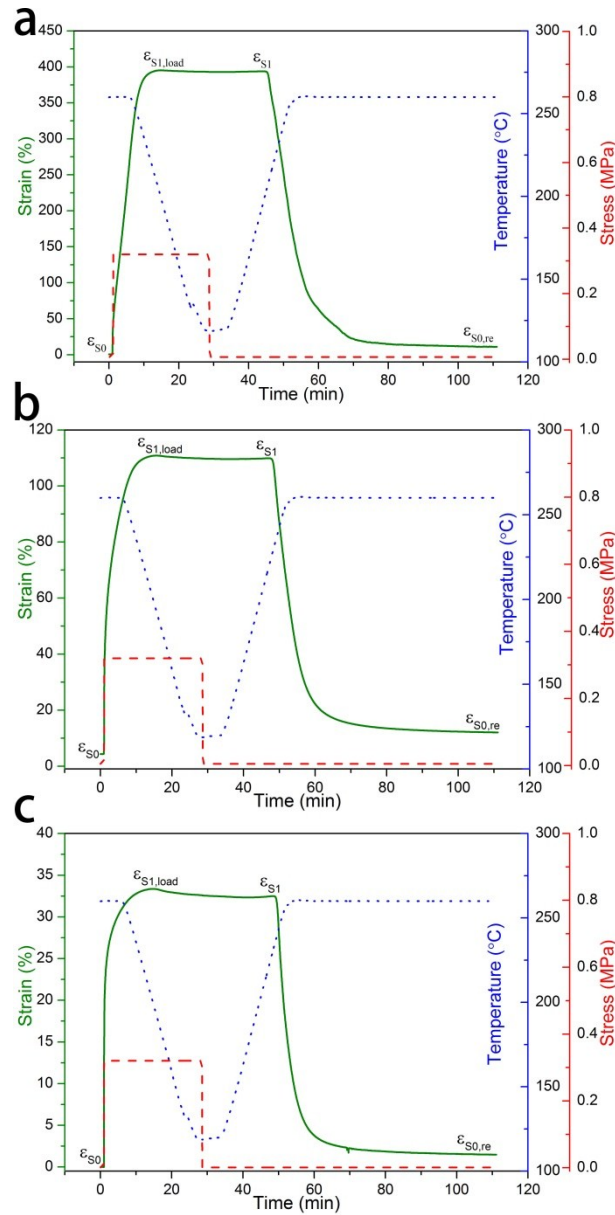

**Fig. S4** a) Dual shape memory cycle for PI-1 at  $T_d=T_r=260$  °C,  $T_f=120$  °C.  $R_f=99.6\%$ ,  $R_r=97.2\%$ . b) Dual shape memory cycle for PI-2 at  $T_d=T_r=260$  °C,  $T_f=120$  °C.  $R_f=99.0\%$ ,  $R_r=92.3\%$ . c) Dual shape memory cycle for PI-5 at  $T_d=T_r=260$  °C,  $T_f=120$  °C.  $R_f=97.6\%$ ,  $R_r=95.5\%$ . Solid line: strain; dotted line: temperature; dashed line: stress.



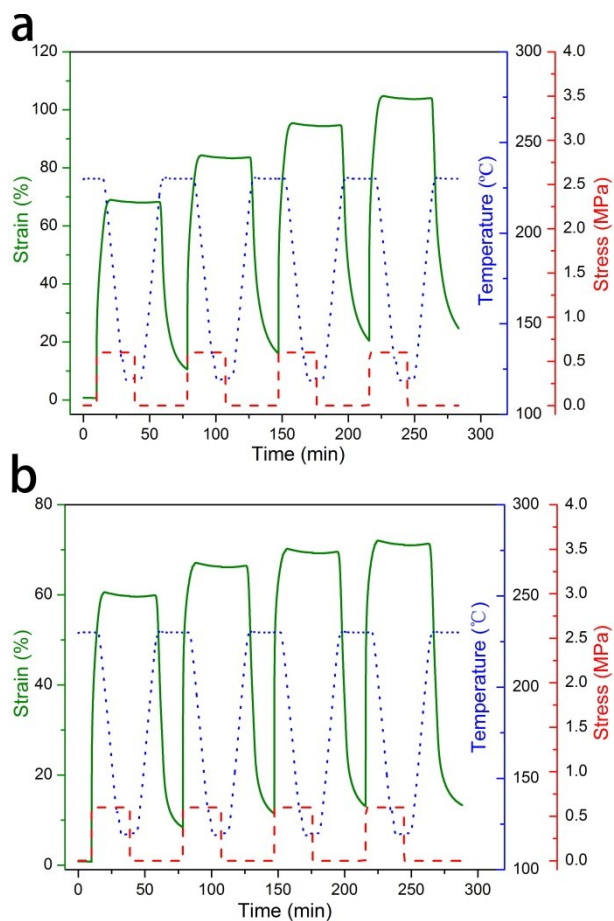

**Fig. S5** a) Consecutive dual-shape memory cycles of PI-0.5 with  $T_d=T_r=230$  °C,  $T_f=120$  °C. b) Consecutive dual-shape memory cycles of PI-5 with  $T_d=T_r=230$  °C,  $T_f=120$  °C.

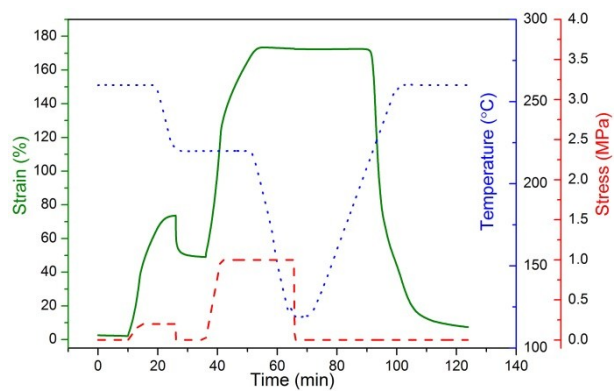

**Fig. S6** Triple-shape memory cycle of PI-0.5 with consecutively recovery temperature

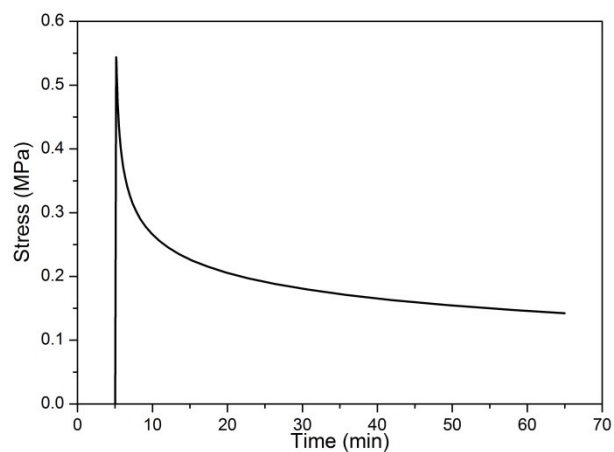

**Fig. S7** Stress relaxation experiment performed on PI-0.5 at 260 °C with strain of 200%.

### Supporting References

1. L. S. Tan and D. H. Wang, *Journal*, 2013.
2. R. Zhao, T. Zhao, X. Jiang, X. Liu, D. Shi, C. Liu, S. Yang and E. Q. Chen, *Adv Mater*, 2017, **29**.
3. T. Raidt, R. Hoeher, M. Meuris, F. Katzenberg and J. C. Tiller, *Macromolecules*, 2016, **49**, 6918-6927.
4. B. Heuwers, A. Beckel, A. Krieger, F. Katzenberg and J. C. Tiller, *Macromolecular Chemistry and Physics*, 2013, **214**, 912-923.
5. R. Hoeher, T. Raidt, M. Rose, F. Katzenberg and J. C. Tiller, *Journal of Polymer Science Part B: Polymer Physics*, 2013, **51**, 1033-1040.
